# Supplementary material for: A releasable disulfide carbonate linker for polyethyleneimine (PEI)-based gene vectors
Source: Royal Society of Chemistry journal article supplement (doi:10.1039/c4nj00699b), 2014-08-04
Supplement: c4nj00699b1.pdf [file c4nj00699b1.pdf]

## Supporting Information

### A releasable disulfide carbonate linker for PEI-based Gene Vectors

<sup>a</sup> School of Chemical Engineering, Nanjing University of Science and Technology, Nanjing 210094, P. R. China.

E-mail address: [weidong@njust.edu.cn](mailto:weidong@njust.edu.cn); Tel: +86-13851816922; fax: +86-25-84312602.

<sup>b</sup> Center for Molecular Metabolism, Nanjing University of Science & Technology, Nanjing 210094, P. R. China.

<sup>c</sup> Key Laboratory of Developmental Genes and Human Disease in Ministry of Education, Department of Biochemistry and Molecular Biology, Medical School of Southeast University, Nanjing, 210009, P. R. China.

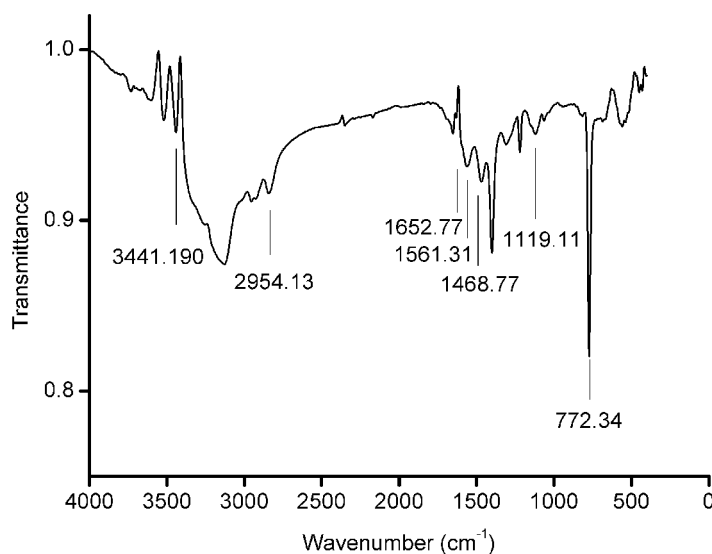

**Figure S1.** FT-IR spectrum of PEI-SS-CL-1.5.

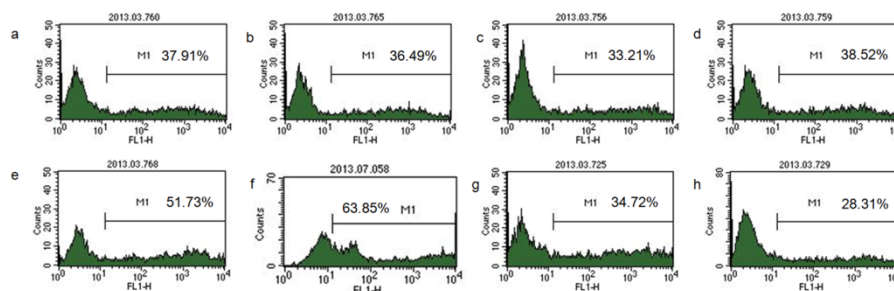

**Figure S2.** Flow cytometry assay of the EGFP expression efficacy in COS-7 cells by PEI-SS-CLs/pDNA polyplexes, compared with PEI 25k and Lipofectamine 2000 at different weight ratios: PEI-SS-CL-1.0 (a) 3.5:1, (b) 4.5:1 and (c) 5.5:1; PEI-SS-CL-1.5 (d) 3.5:1, (e) 4.5:1 and (f) 5.5:1; PEI-25k (g) 3:1 and Lipofectamine 2000 (h) 3:1. M1 represents the percent of cells transfected with pEGFP.

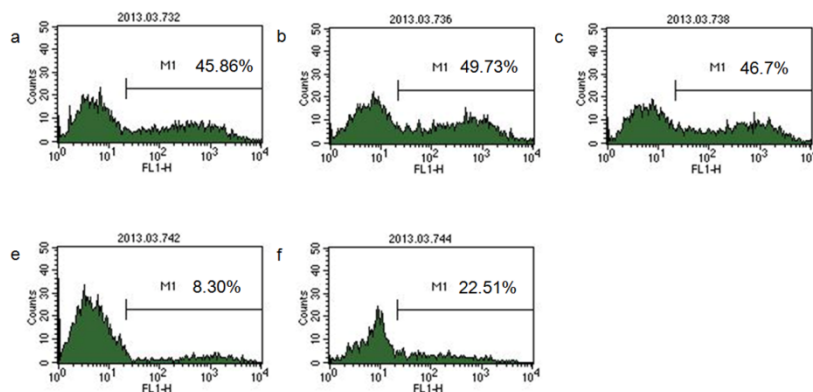

**Figure S3.** Flow cytometry assay of the EGFP expression efficacy in HepG2 cells by PEI-SS-CL-1.5/pDNA polyplexes, compared with PEI 25k and Lipofectamine 2000 at different weight ratios: PEI-SS-CL-1.5 (a) 3.5:1, (b) 4.5:1 and (c) 5.5:1; PEI-25k (d) 3:1; Lipofectamine 2000 (e) 3:1. M1 represents the percent of cells transfected with pEGFP.

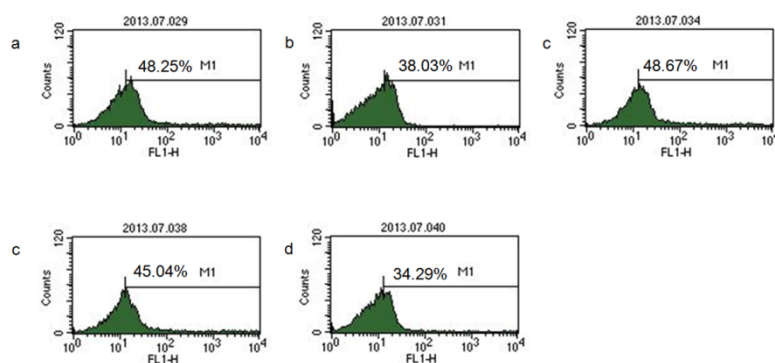

**Figure S4.** Flow cytometry assay of the EGFP expression efficacy in Raw246.7 cells by PEI-SS-CL-1.5/pDNA polyplexes, compared with PEI 25k and Lipofectamine 2000 at different weight ratios: PEI-SS-CL-1.5 (a) 3.5:1, (b) 4.5:1 and (c) 5.5:1; PEI-25k (d) 3:1; Lipofectamine 2000 (e) 3:1. M1 represents the percent of cells transfected with pEGFP.

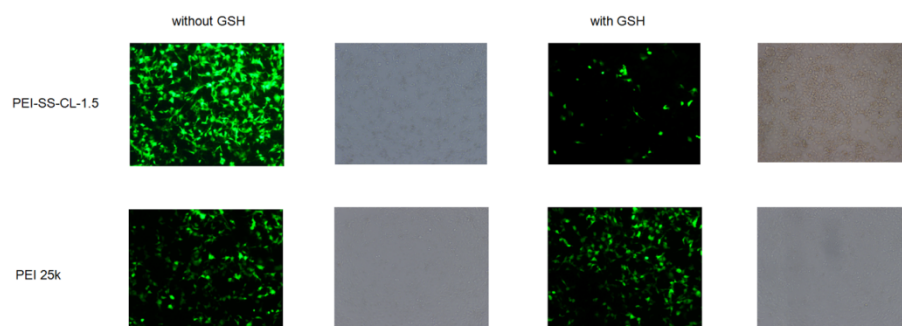

**Figure S5.** Fluorescent microscopy images of COS-7 cells transfected by PEI-SS-CL-1.5 and PEI 25k for 24 h. PEI-SS-CL-1.5 was treated without or with 50 mM DTT for 30 min and formed complexes with EGFP gene. The polymer/DNA weight ratio of the polyplexes was fixed at 5.5:1. PEI 25k was used as a control at w/w weight ratio of 3:1.
